# Supplementary material
Source: PubMed Central journal article supplement (PMC3251641)
Supplement: NIHMS346103-supplement-Suppl__Fig__2.pdf [file NIHMS346103-supplement-Suppl__Fig__2.pdf]

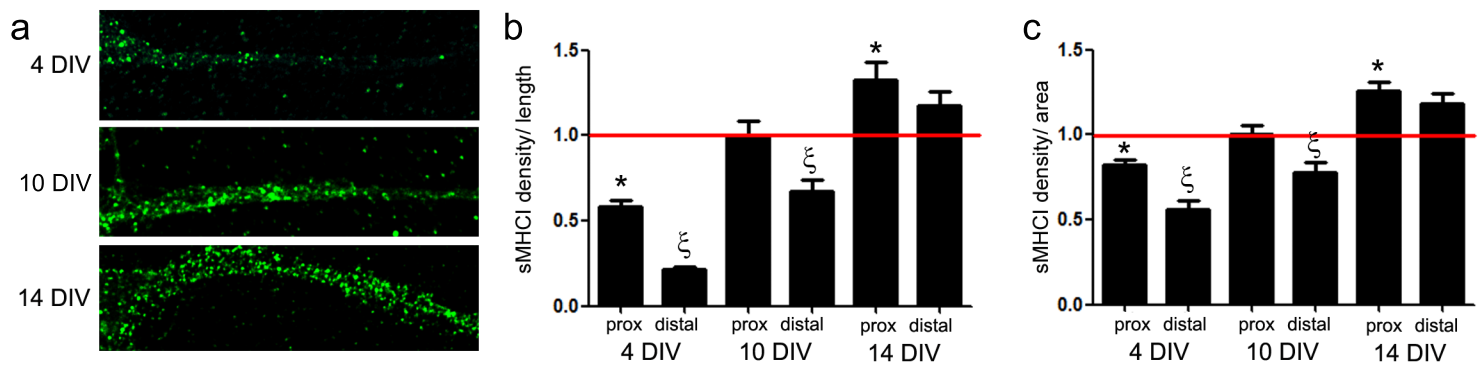

**Suppl. Fig. 2. MHC1 protein is present on the surface of neurons in a developmentally-regulated, non-uniform distribution.** To control for possible fixation-induced permeabilization in the experiments shown in **Fig. 1**, neurons were exposed to primary antibody prior to fixation and then stained as described in Methods in the absence of detergent. **(a)** Images of dendrites from cortical neurons immunostained for surface MHC1 protein at 4, 7, 9 and 14 d.i.v. (top to bottom) are shown proximal to distal from soma (left to right in each image). sMHC1 is present on dendrites of all cells at all ages examined. **(b)** sMHC1 clusters on dendrites increase in density with age. (\*,  $p < 0.05$ ). At 4, 7 and 10 d.i.v., sMHC1 density is higher in proximal dendrites and lower in distal portions of the same dendrites. At 14 d.i.v., this uneven distribution is not observed. **(c)** The uneven distribution of sMHC1 on dendrites is maintained even when quantified as density by area of dendrite (\*, significant difference from 4 and 7 d.i.v. density;  $\xi$ , significant difference between distal and same age proximal densities).
