# Supplementary material
Source: PubMed Central journal article supplement (PMC3251641)
Supplement: NIHMS346103-supplement-Suppl__Fig__5.pdf [file NIHMS346103-supplement-Suppl__Fig__5.pdf]

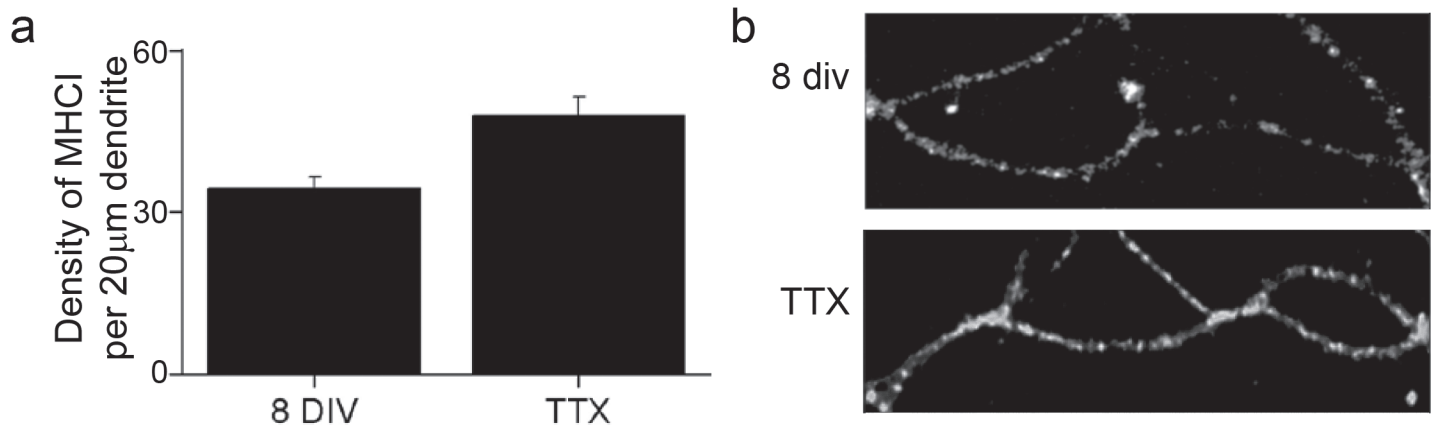

**Suppl. Fig. 5. While TTX decreases sMHCII, it increases internal MHCII.** Although the expression of MHCII protein on the surface of neurons is decreased after 24hr of TTX treatment (**Fig. 7**), the density of MHCII clusters detected in permeabilized neurons following TTX treatment is increased by about 41% (**a**), and is readily apparent qualitatively (**b**). Taken together with data from Fig. 7, these results suggest that TTX causes a rapid internalization of sMHCII to increase the density of MHCII inside the neurons.
